# Supplementary material for: Metal–metal interactions in dinuclear ruthenium complexes containing bridging 4,5-di(2-pyridyl)imidazolates and related ligands
Source: Royal Society of Chemistry journal article supplement (doi:10.1039/b514976m), 2006-01-01
Supplement: b514976m.pdf [file b514976m.pdf]

# Metal-metal interactions in dinuclear ruthenium complexes containing bridging 4,5-di(2-pyridyl)imidazoles and related ligands

Jonathan W. Slater,<sup>a</sup> Deanna M. D'Alessandro,<sup>b</sup> F. Richard Keene<sup>b</sup> and Peter J. Steel\*<sup>a</sup>

<sup>a</sup> Department of Chemistry, University of Canterbury, Christchurch, New Zealand

Email: peter.steel@canterbury.ac.nz

<sup>b</sup> School of Pharmacy & Molecular Sciences, James Cook University, Townsville, Queensland 4811, Australia

Paper Ref.: B514976M

## ELECTRONIC SUPPLEMENTARY INFORMATION

**Table S1** UV/Vis/NIR spectral data of the reduced absorption spectra ( $\epsilon/\nu$  vs.  $\nu$ ) for **3<sup>n+</sup>** and **4<sup>n+</sup>** in 0.1 M [(n-C<sub>4</sub>H<sub>9</sub>)<sub>4</sub>N]PF<sub>6</sub>/CH<sub>3</sub>CN at -35°C. The NIR spectral data are indicated in bold type.<sup>a</sup>

| Complex     | n <sup>+</sup>  | 3                                                                                                        | 4                                                                                                        |
|-------------|-----------------|----------------------------------------------------------------------------------------------------------|----------------------------------------------------------------------------------------------------------|
|             |                 | $\nu_{\max} \pm 10/\text{cm}^{-1}$<br>{ $(\epsilon/\nu)_{\max} \pm 0.0001/\text{M}^{-1}\text{cm}^{-1}$ } | $\nu_{\max} \pm 10/\text{cm}^{-1}$<br>{ $(\epsilon/\nu)_{\max} \pm 0.0001/\text{M}^{-1}\text{cm}^{-1}$ } |
| <i>meso</i> | 4               | <i>sh</i> 17830 (0.3011)                                                                                 | <i>sh</i> 16702 (0.3970)                                                                                 |
|             |                 | 20160 (0.6828)                                                                                           | 19000 (0.9673)                                                                                           |
|             |                 | 24590 (0.8858)                                                                                           | 23510 (0.8643)                                                                                           |
|             | 5               | <b>6590 (1.5218)</b>                                                                                     | <b>5625 (1.4908)</b>                                                                                     |
|             |                 | 15880 (0.2575)                                                                                           | 14380 (0.1880)                                                                                           |
|             |                 | 18870 (0.4582)                                                                                           | 17810 (0.5303)                                                                                           |
| 6           | 24920 (0.4084)  | 23543 (0.3379)                                                                                           |                                                                                                          |
|             | ~12359 (0.0519) |                                                                                                          |                                                                                                          |
|             | 18771 (0.1312)  |                                                                                                          |                                                                                                          |
| <i>rac</i>  | 4               | <i>sh</i> 17892 (0.3743)                                                                                 | <i>sh</i> 16690 (0.3992)                                                                                 |
|             |                 | 20190 (0.7951)                                                                                           | 18920 (0.9629)                                                                                           |
|             |                 | 24620 (1.0359)                                                                                           | 23570 (0.9117)                                                                                           |
|             | 5               | <b>6460 (1.2737)</b>                                                                                     | <b>5628 (0.8994)</b>                                                                                     |
|             |                 | 15895 (0.1883)                                                                                           | 14410 (0.2326)                                                                                           |
|             |                 | 18840 (0.3703)                                                                                           | 18370 (0.5161)                                                                                           |
|             |                 | 24910 (0.3522)                                                                                           | 23930 (0.4854)                                                                                           |

<sup>a</sup> *meso*4<sup>6+</sup>, *rac*3<sup>6+</sup> and *rac*4<sup>6+</sup> not measured.

**Table S2** UV/Vis/NIR spectral data of the reduced absorption spectra ( $\epsilon/\nu$  vs.  $\nu$ ) for  $9^{n+}$  in 0.1 M [(*n*-C<sub>4</sub>H<sub>9</sub>)<sub>4</sub>N]PF<sub>6</sub>/CH<sub>3</sub>CN and 0.02 M [(*n*-C<sub>4</sub>H<sub>9</sub>)<sub>4</sub>N]{B(C<sub>6</sub>F<sub>5</sub>)<sub>4</sub>}<sup>-</sup>/CH<sub>3</sub>CN at -35°C. The NIR spectral data are indicated in bold type.<sup>a</sup>

| Complex                     | <i>n</i> <sup>+</sup> | PF <sub>6</sub> <sup>-</sup>                                                                             | {B(C <sub>6</sub> F <sub>5</sub> ) <sub>4</sub> } <sup>-</sup>                                           |
|-----------------------------|-----------------------|----------------------------------------------------------------------------------------------------------|----------------------------------------------------------------------------------------------------------|
|                             |                       | $\nu_{\max} \pm 10/\text{cm}^{-1}$<br>{ $(\epsilon/\nu)_{\max} \pm 0.0001/\text{M}^{-1}\text{cm}^{-1}$ } | $\nu_{\max} \pm 10/\text{cm}^{-1}$<br>{ $(\epsilon/\nu)_{\max} \pm 0.0001/\text{M}^{-1}\text{cm}^{-1}$ } |
| <b>9a<sup>n+</sup> meso</b> | 3                     | 21305 (1.3060)                                                                                           | 21290 (1.3189)                                                                                           |
|                             |                       | 22480 (1.2337)                                                                                           | 22354 (1.2414)                                                                                           |
|                             |                       | 27935 (0.9329)                                                                                           | 27920 (0.9383)                                                                                           |
|                             | 4                     | <b>4560 (1.2061)</b>                                                                                     | <b>4105 (0.9119)</b>                                                                                     |
|                             |                       | 9806 (0.3258)                                                                                            | 9110 (0.2793)                                                                                            |
|                             |                       | 10700 (0.2668)                                                                                           | 9990 (0.2204)                                                                                            |
|                             |                       | 22340 (0.8190)                                                                                           | 22190 (0.6665)                                                                                           |
|                             |                       | 28370 (0.9067)                                                                                           | 27725 (0.7955)                                                                                           |
|                             | 5                     | 18965 (0.3752)                                                                                           | 19385 (0.2488)                                                                                           |
| 27768 (1.0277)              |                       | 26885 (0.8709)                                                                                           |                                                                                                          |
| 28865 (1.1227)              |                       | 28100 (0.9049)                                                                                           |                                                                                                          |
| <b>9a<sup>n+</sup> rac</b>  | 3                     | 21070 (1.3192)                                                                                           | 21065 (1.3255)                                                                                           |
|                             |                       | 22650 (1.2322)                                                                                           | 22520 (1.2433)                                                                                           |
|                             |                       | 28010 (1.0122)                                                                                           | 28025 (0.9951)                                                                                           |
|                             | 4                     | <b>4474 (1.4816)</b>                                                                                     | <b>4117 (0.9668)</b>                                                                                     |
|                             |                       | 9818 (0.4286)                                                                                            | 9116 (0.2658)                                                                                            |
|                             |                       | 10730 (0.3762)                                                                                           | 10062 (0.2163)                                                                                           |
|                             |                       | 22295 (1.0266)                                                                                           | 22205 (0.6515)                                                                                           |
|                             |                       | 28445 (1.1114)                                                                                           | 27845 (0.8682)                                                                                           |
|                             | 5                     | 18890 (0.4771)                                                                                           | 19430 (0.2157)                                                                                           |
|                             |                       | 27600 (1.2592)                                                                                           | 26930 (0.9165)                                                                                           |
|                             |                       | 28580 (1.3522)                                                                                           | 28130 (0.9638)                                                                                           |
|                             |                       |                                                                                                          |                                                                                                          |

**Table S3** NIR spectral data of the reduced absorption spectra ( $\epsilon/\nu$  vs.  $\nu$ ) for  $3^{5+}$  and  $4^{5+}$  in 0.1 M [(*n*-C<sub>4</sub>H<sub>9</sub>)<sub>4</sub>N]PF<sub>6</sub>/CH<sub>3</sub>CN at -35°C. For the dinuclear species, the parameters for the overall NIR band envelopes are shown in bold type: details of the deconvoluted bands are in normal type.

| Complex                   | Component | $\nu_{\max} \pm 10/\text{cm}^{-1}$ | $(\epsilon/\nu)_{\max} \pm 0.0001/\text{M}^{-1}$ | $\Delta\nu_{1/2} \pm 20/\text{cm}^{-1}$ | $\Delta\nu_{1/2}^{\circ}/\text{cm}^{-1}$ | $M_0/\text{M}^{-1}$ | $H_{\text{ab}}/\text{cm}^{-1}$ |
|---------------------------|-----------|------------------------------------|--------------------------------------------------|-----------------------------------------|------------------------------------------|---------------------|--------------------------------|
| <b>3meso<sup>5+</sup></b> |           | <b>6590</b>                        | <b>1.5218</b>                                    | <b>1470</b>                             | <b>3480</b>                              | <b>3211</b>         | <b>3295</b>                    |
|                           | 1         | 5140                               | 0.3339                                           | 1330                                    |                                          | 472.1               |                                |
|                           | 2         | 6570                               | 1.3959                                           | 1210                                    |                                          | 1802                | 2570                           |
|                           | 3         | 7686                               | 0.3742                                           | 1620                                    |                                          | 645.7               |                                |
| <b>3rac<sup>5+</sup></b>  |           | <b>6460</b>                        | <b>1.2737</b>                                    | <b>1492</b>                             | <b>3440</b>                              | <b>2650</b>         | <b>3230</b>                    |
|                           |           | 3782                               | 0.2670                                           | 1950                                    |                                          | 350.9               |                                |
|                           | 1         | 5020                               | 0.1574                                           | 1050                                    |                                          | 175.9               |                                |
|                           | 2         | 6438                               | 0.9936                                           | 1267                                    |                                          | 1340                | 2510                           |
|                           | 3         | 7650                               | 0.2676                                           | 1564                                    |                                          | 445.7               |                                |
| <b>4meso<sup>5+</sup></b> |           | <b>5625</b>                        | <b>1.4908</b>                                    | <b>1346</b>                             | <b>3210</b>                              | <b>2538</b>         | <b>2813</b>                    |
|                           | 1         | 4425                               | 0.2682                                           | 850.4                                   |                                          | 241.5               |                                |
|                           | 2         | 5600                               | 1.4058                                           | 1023                                    |                                          | 1530                | 2800                           |
|                           | 3         | 6460                               | 0.4536                                           | 1016                                    |                                          | 490.7               |                                |
|                           |           | 7175                               | 0.1540                                           | 1405                                    |                                          | 230.4               |                                |
| <b>4rac<sup>5+</sup></b>  |           | <b>5628</b>                        | <b>0.8995</b>                                    | <b>1516</b>                             | <b>3215</b>                              | <b>1656</b>         | <b>2814</b>                    |
|                           | 1         | 4400                               | 0.1552                                           | 790                                     |                                          | 130.1               |                                |
|                           | 2         | 5600                               | 0.8453                                           | 1093                                    |                                          | 984.3               | 2800                           |
|                           | 3         | 6515                               | 0.3023                                           | 1050                                    |                                          | 338.5               |                                |
|                           |           | 7260                               | 0.1076                                           | 1543                                    |                                          | 176.8               |                                |

**Table S4** NIR spectral data of the reduced absorption spectra ( $\epsilon/\nu$  vs.  $\nu$ ) for  $\mathbf{9}^{4+}$  in 0.1 M [(*n*-C<sub>4</sub>H<sub>9</sub>)<sub>4</sub>N]PF<sub>6</sub>/CH<sub>3</sub>CN and 0.02 M [(*n*-C<sub>4</sub>H<sub>9</sub>)<sub>4</sub>N]{B(C<sub>6</sub>F<sub>5</sub>)<sub>4</sub>}/CH<sub>3</sub>CN at -35°C. The parameters for the overall NIR band envelopes are shown in bold type and details of the deconvoluted bands are in normal type.<sup>a</sup>

| Electrolyte                                                    | Complex                    | Component | $\nu_{\max}$<br>$\pm 10$<br>/cm <sup>-1</sup> | $(\epsilon/\nu)_{\max}$<br>$\pm 0.0001$<br>/M <sup>-1</sup> | $\Delta\nu_{1/2}$<br>$\pm 20$<br>/cm <sup>-1</sup> | $\Delta\nu_{1/2}^{\circ}$<br>/cm <sup>-1</sup> | $M_0^c$<br>/M <sup>-1</sup> | $H_{\text{ab}}$<br>/cm <sup>-1</sup> |  |
|----------------------------------------------------------------|----------------------------|-----------|-----------------------------------------------|-------------------------------------------------------------|----------------------------------------------------|------------------------------------------------|-----------------------------|--------------------------------------|--|
| PF <sub>6</sub> <sup>-</sup>                                   | <b>9rac</b> <sup>4+</sup>  |           | <b>4475</b>                                   | <b>1.4816</b>                                               | <b>1112<sup>b</sup></b>                            | <b>2866</b>                                    |                             |                                      |  |
|                                                                |                            | 2         | 4450                                          | 1.4006                                                      | 1947                                               |                                                | 2693                        |                                      |  |
|                                                                |                            | 3         | 6340                                          | 0.2124                                                      | 1570                                               |                                                | 355                         |                                      |  |
|                                                                |                            | 4         | 9678                                          | 0.2765                                                      | 1370                                               |                                                | 404                         |                                      |  |
|                                                                |                            | 5         | 10950                                         | 0.2003                                                      | 1540                                               |                                                | 328                         |                                      |  |
|                                                                |                            | 6         | 12310                                         | 0.08094                                                     | 2005                                               |                                                | 172                         |                                      |  |
|                                                                | <b>9meso</b> <sup>4+</sup> |           |                                               | <b>4560</b>                                                 | <b>1.2061</b>                                      | <b>1029<sup>b</sup></b>                        | <b>2893</b>                 |                                      |  |
|                                                                |                            | 2         | 4302                                          | 1.2301                                                      | 2380                                               |                                                | 2663                        |                                      |  |
|                                                                |                            | 3         | 6582                                          | 0.1270                                                      | 1984                                               |                                                | 268                         |                                      |  |
|                                                                |                            | 4         | 9797                                          | 0.2982                                                      | 1580                                               |                                                | 500                         |                                      |  |
|                                                                |                            | 5         | 11117                                         | 0.1378                                                      | 1204                                               |                                                | 176                         |                                      |  |
|                                                                |                            | 6         | 12185                                         | 0.0873                                                      | 2032                                               |                                                | 188                         |                                      |  |
| {B(C <sub>6</sub> F <sub>5</sub> ) <sub>4</sub> } <sup>-</sup> | <b>9rac</b> <sup>4+</sup>  |           | <b>4120</b>                                   | <b>0.9668</b>                                               | <b>1148<sup>b</sup></b>                            | <b>2750</b>                                    |                             |                                      |  |
|                                                                |                            | 2         | 3980                                          | 0.9351                                                      | 2230                                               |                                                | 1625                        |                                      |  |
|                                                                |                            | 3         | 6058                                          | 0.1318                                                      | 2040                                               |                                                | 285                         |                                      |  |
|                                                                |                            | 4         | 9140                                          | 0.2377                                                      | 1640                                               |                                                | 415                         |                                      |  |
|                                                                |                            | 5         | 10410                                         | 0.08727                                                     | 1152                                               |                                                | 107                         |                                      |  |
|                                                                |                            | 6         | 11347                                         | 0.07440                                                     | 1990                                               |                                                | 157                         |                                      |  |
|                                                                | <b>9meso</b> <sup>4+</sup> |           |                                               | <b>4105</b>                                                 | <b>0.9119</b>                                      | <b>1160<sup>b</sup></b>                        | <b>2745</b>                 |                                      |  |
|                                                                |                            | 2         | 3960                                          | 0.9151                                                      | 2355                                               |                                                | 1683                        |                                      |  |
|                                                                |                            | 3         | 6197                                          | 0.1287                                                      | 1816                                               |                                                | 248                         |                                      |  |
|                                                                |                            | 4         | 9128                                          | 0.2551                                                      | 1636                                               |                                                | 444                         |                                      |  |
|                                                                |                            | 5         | 10430                                         | 0.08557                                                     | 1130                                               |                                                | 103                         |                                      |  |
|                                                                |                            | 6         | 11293                                         | 0.07602                                                     | 2090                                               |                                                | 170                         |                                      |  |

<sup>a</sup> The first component was obscured at the detector limit and an accurate determination of the parameters was precluded.

<sup>b</sup> Bandwidth for the high-energy side of the IVCT manifold. The lower energy side was obscured at the detector limit.

<sup>c</sup> The  $M_0$  for the full band manifold could not be measured reliably.

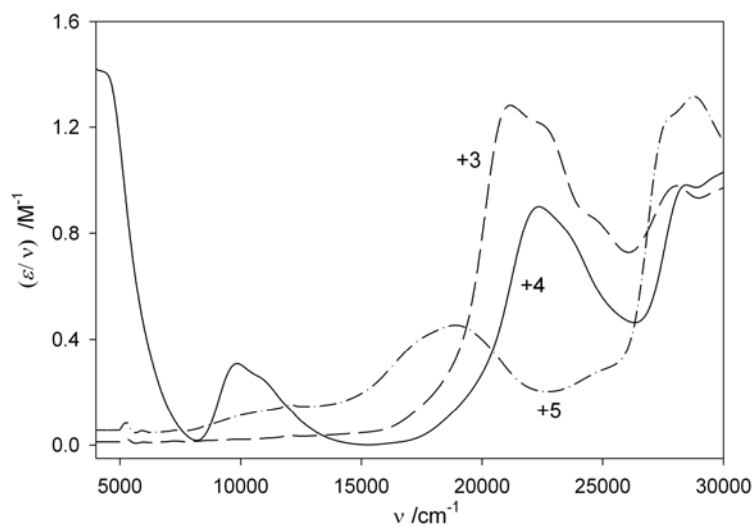

**Figure S1** Overlay of the spectra for  $9rac^{n+}$   $\{n = 3, 4, 5\}$  in 0.1 M  $[(n-C_4H_9)_4N]PF_6/CH_3CN$  at  $-35^\circ C$ .

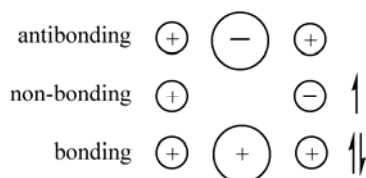

**Figure S2** Qualitative molecular orbital diagram for the dinuclear  $[\{Ru(bpy)_2\}_2(\mu-BL)]^{5+}$  systems showing the bonding, non-bonding and antibonding molecular orbitals. The IVCT corresponds to a bonding  $\rightarrow$  non-bonding transition.
